# Supplementary material for: Incidence, risk factors and outcomes of new-onset atrial fibrillation in patients with sepsis: a systematic review
Source: Springer Nature journal article supplement (doi:10.1186/s13054-014-0688-5), 2014-12-09
Supplement: MOESM1 [file 9779992]

**eTable 1.** Search query

| MEDLINE                                |                                                                                                                                                                                                                                                                                                                                                                                      |     |
|----------------------------------------|--------------------------------------------------------------------------------------------------------------------------------------------------------------------------------------------------------------------------------------------------------------------------------------------------------------------------------------------------------------------------------------|-----|
|                                        | Search terms                                                                                                                                                                                                                                                                                                                                                                         | n   |
| #1 Determinant:<br>Atrial fibrillation | 'atrial fibrillation' [MeSH] OR 'cardiac arrhythmias' [MeSH] OR 'supraventricular tachycardia' [MeSH] OR 'atrial fibrillation' [Title/Abstract] OR 'auricular fibrillation' [Title/Abstract] OR 'cardiac arrhythmia' [Title/Abstract] OR 'cardiac dysrhythmia' [Title/Abstract] OR 'supraventricular tachycardia' [Title/Abstract] OR 'supraventricular arrhythmia' [Title/Abstract] |     |
| #2 Domain:<br>Sepsis                   | 'sepsis' [MeSH] OR 'septic shock' [MeSH] OR 'sepsis' [Title/Abstract] OR 'septicemia' [Title/Abstract] OR 'septicaemia' [Title/Abstract] OR 'severe sepsis' [Title/Abstract] OR 'septic shock' [Title/Abstract]                                                                                                                                                                      |     |
| Combined set                           | #1 AND #2                                                                                                                                                                                                                                                                                                                                                                            | 702 |

MeSH: Medical Subject Headings.

| EMBASE                                 |                                                                                                                                                                                                           |     |
|----------------------------------------|-----------------------------------------------------------------------------------------------------------------------------------------------------------------------------------------------------------|-----|
|                                        | Search terms                                                                                                                                                                                              | n   |
| #1 Determinant:<br>Atrial fibrillation | 'atrial fibrillation':ab,ti OR 'auricular fibrillation':ab,ti OR 'cardiac arrhythmia':ab,ti OR 'cardiac dysrhythmia':ab,ti OR 'supraventricular tachycardia':ab,ti OR 'supraventricular arrhythmia':ab,ti |     |
| #2 Domain:<br>Sepsis                   | 'sepsis':ab,ti OR 'septicemia':ab,ti OR 'septicaemia':ab,ti OR 'severe sepsis':ab,ti OR 'septic shock':ab,ti                                                                                              |     |
| Combined set                           | #1 AND #2                                                                                                                                                                                                 | 601 |

| Web of Science                         |                                                                                                                                                                                                           |     |
|----------------------------------------|-----------------------------------------------------------------------------------------------------------------------------------------------------------------------------------------------------------|-----|
|                                        | Search terms                                                                                                                                                                                              | n   |
| #1 Determinant:<br>Atrial fibrillation | Topic=(Atrial Fibrillation) OR Topic=(Auricular Fibrillation) OR Topic=(Cardiac Arrhythmia) OR Topic=(Cardiac Dysrhythmia) OR Topic=(Supraventricular Tachycardia) OR Topic=(Supraventricular arrhythmia) |     |
| #2 Domain:<br>Sepsis                   | Topic=(Sepsis) OR Topic=(Septicemia) OR Topic=(Septicaemia) OR Topic=(Severe Sepsis) OR Topic=(Septic Shock)                                                                                              |     |
| Combined set                           | #1 AND #2                                                                                                                                                                                                 | 380 |
