# Supplementary material for: Incidence, risk factors and outcomes of new-onset atrial fibrillation in patients with sepsis: a systematic review
Source: Springer Nature journal article supplement (doi:10.1186/s13054-014-0688-5), 2014-12-09
Supplement: MOESM3 [file 9779992]

**eTable 3.** Risk factors for new-onset atrial fibrillation in patients with sepsis

| Risk factor                        | Patients with new-onset AF | Patients without new-onset AF | Crude OR (95% CI)   | p-value | Adjusted OR (95% CI) | p-value |
|------------------------------------|----------------------------|-------------------------------|---------------------|---------|----------------------|---------|
| <b>Christian 2008</b>              |                            |                               |                     |         |                      |         |
| Number at risk                     | 16                         | 256                           |                     |         |                      |         |
| Age, y                             | 65.6 ± 12.3                | 62.2 ± 16.5                   |                     | 0.4     |                      |         |
| Surgery (≤7 days before admission) | 7 (44)                     | 82 (32)                       | 1.65 (0.59-4.59)    | 0.41    |                      |         |
| Severity of illness                |                            |                               |                     |         |                      |         |
| APACHE II                          | 0.49 ± 0.17                | 0.55 ± 0.26                   |                     | 0.36    |                      |         |
| Shock                              | 10 (63)                    | 80 (31)                       | 3.67 (1.29-10.44)   | 0.01    |                      |         |
| Critical care interventions        |                            |                               |                     |         |                      |         |
| Mechanical ventilation             | 16 (100)                   | 154 (60)                      | 21.19 (1.26-357.68) | <0.01   |                      |         |
| Pulmonary artery catheter          | 11 (69)                    | 90 (35)                       | 4.06 (1.37-12.04)   | 0.01    |                      |         |
| <b>Meierhenrich 2010</b>           |                            |                               |                     |         |                      |         |
| Number at risk                     | 23                         | 27                            |                     |         |                      |         |
| Age, y                             | 66 (41-85)                 | 56 (18-80)                    |                     | <0.01   |                      |         |
| Gender (female)                    | 5 (22)                     | 12 (44)                       | 0.35 (0.10-1.21)    | 0.14    |                      |         |
| Comorbidities                      |                            |                               |                     |         |                      |         |
| COPD                               | 4 (17)                     | 1 (4)                         | 5.47 (0.57-52.97)   | 0.17    |                      |         |
| Coronary artery disease            | 5 (22)                     | 2 (7)                         | 3.47 (0.60-19.95)   | 0.23    |                      |         |
| Heart failure                      | 1 (4)                      | 0 (0)                         | 2.45 (0.08-76.64)   | 0.46    |                      |         |
| Hypertension                       | 17 (74)                    | 11 (41)                       | 4.12 (1.23-13.77)   | 0.02    |                      |         |
| Valvular disease                   | 1 (4)                      | 1 (4)                         | 1.18 (0.07-20.01)   | 1.00    |                      |         |
| Chronic drug use                   |                            |                               |                     |         |                      |         |
| ACE inhibitor                      | 2 (9)                      | 7 (26)                        | 0.27 (0.05-1.47)    | 0.15    |                      |         |
| β-blocker                          | 8 (35)                     | 6 (22)                        | 1.87 (0.54-6.51)    | 0.36    |                      |         |
| Calcium antagonist                 | 7 (30)                     | 2 (7)                         | 5.47 (1.01-29.7)    | 0.06    |                      |         |
| Digoxin                            | 1 (4)                      | 0 (0)                         | 2.43 (0.21-28.58)   | 0.46    |                      |         |
| Surgery                            |                            |                               |                     |         |                      |         |
| Abdominal                          | 12 (52)                    | 19 (70)                       | 0.46 (0.14-1.47)    |         |                      |         |
| Aortic                             | 4 (17)                     | 1 (4)                         | 4.47 (0.57-52.97)   |         |                      |         |
| Lung                               | 4 (17)                     | 2 (7)                         | 2.63 (0.44-15.91)   |         |                      |         |
| Neuro                              | 1 (4)                      | 1 (4)                         | 1.18 (0.07-20.01)   |         |                      |         |
| Traumatologic                      | 0 (0)                      | 2 (7)                         | -                   |         |                      |         |
| Vascular                           | 0 (0)                      | 2 (7)                         | -                   |         |                      |         |
| Other                              | 2 (9)                      | 0 (0)                         | -                   |         |                      |         |

|                                    |                  |                  |                   |                               |
|------------------------------------|------------------|------------------|-------------------|-------------------------------|
| <b>Severity of illness</b>         |                  |                  |                   |                               |
| CRP level, max (mg/dl)             | 288 (72-483)     | 273 (23-214)     |                   | 0.28                          |
| SAPS II                            | 31 (15-63)       | 30 (12-65)       |                   | 0.12                          |
| SOFA max                           | 12 (7-17)        | 9 (5-18)         |                   | 0.01                          |
| <b>Critical care interventions</b> |                  |                  |                   |                               |
| Dobutamine                         | 10 (44)          | 6 (22)           | 2.69 (0.79-9.17)  | 0.14                          |
| Noradrenaline, max (µg/kg/min)     | 0.50 (0.15-2.00) | 0.30 (0.15-1.40) |                   | 0.13                          |
| <b>Salman 2008</b>                 |                  |                  |                   |                               |
| <b>Number at risk</b>              | <b>25</b>        | <b>56</b>        |                   |                               |
| Age, y                             | 67.0 ± 9.6       | 55.7 ± 15.0      |                   | <0.01                         |
| Gender (female)                    | 7 (28)           | 28 (50)          | 0.39 (0.14-1.08)  | 0.06                          |
| White race                         | 25 (100)         | 52 (93)          | 3.85 (0.20-75.60) | 0.31                          |
| Surgical patients                  | 1 (4)            | 4 (7)            | 0.54 (0.06-5.11)  | 1.00                          |
| <b>Comorbidities</b>               |                  |                  |                   |                               |
| Cerebrovascular disease            | 2 (8)            | 2 (4)            | 2.35 (0.31-17.70) | 0.59                          |
| COPD                               | 1 (4)            | 1 (2)            | 2.29 (0.14-38-18) | 0.52                          |
| Coronary artery disease            | 2 (8)            | 2 (4)            | 2.35 (0.31-17.70) | 0.59                          |
| Diabetes mellitus                  | 4 (16)           | 15 (27)          | 0.52 (0.15-1.77)  | 0.40                          |
| Hypertension                       | 11 (44)          | 21 (38)          | 1.31 (0.50-3.41)  | 0.58                          |
| Previous PAF                       | 4 (16)           | 1 (2)            | 10.48(1.11-99.22) | 0.03                          |
| <b>Severity of illness</b>         |                  |                  |                   |                               |
| Acute Physiology Score             | 85.0 ± 29.6      | 68.7 ± 32.4      |                   | 0.03                          |
| APACHE III                         | 106.0 ± 31.9     | 85.0 ± 33.0      |                   | 0.01                          |
| <b>Walkey 2011</b>                 |                  |                  |                   |                               |
| <b>Number at risk</b>              | <b>2,896</b>     | <b>36,200</b>    |                   |                               |
| Age, y                             | 74 ± 12          | 66 ± 17          |                   | 1.52 (1.47-1.56) <sup>a</sup> |
| Gender (female)                    | 1,280 (44)       | 17,690 (49)      | 0.83 (0.77-0.89)  | 0.83 (0.76-0.90)              |
| <b>Race</b>                        |                  |                  |                   |                               |
| White                              | 1,861 (64)       | 19,006 (53)      | 1.63 (1.50-1.76)  | 1 (reference)                 |
| Black                              | 209 (7)          | 3,547 (10)       | 0.72 (0.62-0.83)  | 0.67 (0.58-0.78)              |
| Hispanic                           | 384 (13)         | 8,045 (22)       | 0.54 (0.48-0.60)  | 0.58 (0.50-0.63)              |
| Other                              | 442 (15)         | 5,502 (15)       | 1.00 (0.90-1.12)  | 0.78 (0.69-0.87)              |
| <b>Comorbidities</b>               |                  |                  |                   |                               |
| Congestive heart failure           | 306 (11)         | 2,312 (6)        | 1.73 (1.53-1.96)  | 1.61 (1.41-1.83)              |
| COPD                               | 189 (7)          | 1,920 (5)        | 1.25 (1.07-1.45)  |                               |
| Diabetes mellitus                  | 800 (28)         | 12,135 (34)      | 0.76 (0.70-0.82)  | 0.82 (0.75-0.90)              |
| Hypertension                       | 1,336 (46)       | 17,373 (48)      | 0.93 (0.86-1.00)  | 0.88 (0.81-0.95)              |
| Malignancy                         | 189 (7)          | 1,920 (5)        | 1.25 (1.07-1.45)  | 1.23 (1.09-1.39)              |
| Myocardial infarction              | 165 (6)          | 1,659 (5)        | 1.26 (1.07-1.48)  |                               |
| Obesity                            | 208 (7)          | 2,914 (8)        | 0.88 (0.76-1.02)  | 1.20 (1.03-1.40)              |
| Stroke                             | 126 (4)          | 880 (2)          | 1.83 (1.51-2.21)  | 1.64 (1.35-2.01)              |
| <b>Severity of illness</b>         |                  |                  |                   |                               |
| Total organ failures               | 3.10 ± 1.28      | 2.44 ± 1.35      |                   |                               |
| Circulatory failure                | 2,049 (71)       | 23,264 (64)      | 1.35 (1.24-1.46)  |                               |
| Hematologic failure                | 933 (32)         | 7,301 (20)       | 1.88 (1.73-2.04)  | 1.50 (1.34-1.68)              |
| Hepatic failure                    | 334 (12)         | 3,150 (9)        | 1.37 (1.21-1.54)  |                               |
| Metabolic failure                  | 706 (24)         | 7,246 (20)       | 1.29 (1.18-1.41)  |                               |
| Neurologic failure                 | 526 (18)         | 5,318 (15)       | 1.29 (1.17-1.42)  |                               |
| Renal failure                      | 2,048 (71)       | 21,343 (59)      | 1.68 (1.55-1.83)  | 1.40 (1.26-1.56)              |
| Respiratory failure                | 2,385 (82)       | 20,833 (58)      | 3.44 (3.12-3.80)  | 2.81 (2.48-3.19)              |
| Electrolyte abnormality            | 2,051 (71)       | 23,963 (66)      | 1.24 (1.14-1.35)  |                               |
| <b>Critical care interventions</b> |                  |                  |                   |                               |
| Pulmonary artery catheter          | 172 (6)          | 722 (2)          | 3.10 (2.62-3.68)  | 2.25 (1.87-2.70)              |
| <b>Source of infection</b>         |                  |                  |                   |                               |
| Abdominal                          | 735 (25)         | 5,532 (15)       | 1.89 (1.73-2.06)  | 1.77 (1.59-1.97)              |
| Primary bacteremia                 | 600 (21)         | 8,910 (25)       | 0.80 (0.73-0.88)  | 1.17 (1.02-1.36)              |
| Respiratory tract                  | 1,419 (49)       | 14,178 (39)      | 1.49 (1.38-1.61)  | 1.27 (1.14-1.40)              |
| Skin or soft tissue                | 229 (8)          | 2,888 (8)        | 0.99 (0.86-1.14)  | 1.33 (1.14-1.55)              |
| Urinary tract                      | 950 (33)         | 13,748 (38)      | 0.80 (0.74-0.86)  | 0.89 (0.81-0.99)              |

|                                    |            |                |                  |                         |
|------------------------------------|------------|----------------|------------------|-------------------------|
| <b>Pathogen type</b>               |            |                |                  |                         |
| Fungal                             | 104 (4)    | 632 (2)        | 2.10 (1.70-2.59) | 1.59 (1.27-2.00)        |
| Gram-negative bacteria             | 677 (23)   | 8,776 (24)     | 0.95 (0.87-1.04) |                         |
| Gram-positive bacteria             | 822 (28)   | 8,675 (24)     | 1.26 (1.16-1.37) | 1.29 (1.18-1.55)        |
| Not specified                      | 1,538 (53) | 20,268 (56)    | 0.89 (0.83-0.96) |                         |
| <b>Walkey 2013</b>                 |            |                |                  |                         |
| <b>Total number of patients</b>    |            | <b>40,740</b>  |                  |                         |
| <b>Age, y</b>                      |            |                |                  |                         |
| 67-74                              |            |                |                  | 1.00 (reference)        |
| 75-84                              |            |                |                  | 1.34 (1.25-1.45) <0.01  |
| ≥ 85                               |            |                |                  | 1.69 (1.57-1.83) <0.01  |
| <b>Gender (female)</b>             |            |                |                  | 0.99 (0.93-1.04) 0.66   |
| <b>Race</b>                        |            |                |                  |                         |
| Black                              |            |                |                  | 0.65 (0.59-0.72) <0.01  |
| White                              |            |                |                  | 1.00 (reference)        |
| Other                              |            |                |                  | 0.65 (0.56-0.76) <0.01  |
| <b>Comorbidities</b>               |            |                |                  |                         |
| COPD                               |            |                |                  | 0.92 (0.86-0.98) 0.01   |
| Diabetes mellitus                  |            |                |                  | 0.92 (0.87-0.98) 0.01   |
| Heart failure                      |            |                |                  | 0.97 (0.91-1.04) 0.38   |
| Hypertension                       |            |                |                  | 0.97 (0.90-1.04) 0.36   |
| Renal disease                      |            |                |                  | 0.81 (0.75-0.88) <0.01  |
| Valvular heart disease             |            |                |                  | 0.98 (0.91-1.06) 0.65   |
| <b>Severity of illness</b>         |            |                |                  |                         |
| Any organ failure                  |            |                |                  | 1.26 (1.17-1.36) <0.01  |
| ICU admission                      |            |                |                  | 2.04 (1.90-2.19) <0.01  |
| New-onset dialysis                 |            |                |                  | 1.02 (0.83-1.27) 0.84   |
| <b>Critical care interventions</b> |            |                |                  |                         |
| Mechanical ventilation             |            |                |                  | 1.09 (1.01-1.17) 0.03   |
| Pulmonary artery catheter          |            |                |                  | 1.37 (1.12-1.68) <0.01  |
| <b>Source of infection</b>         |            |                |                  |                         |
| Gastrointestinal                   |            |                |                  | 0.93 (0.85-1.03) 0.17   |
| Pneumonia                          |            |                |                  | 1.07 (1.00-1.14) 0.04   |
| Skin or soft tissue                |            |                |                  | 0.88 (0.77-1.02) 0.08   |
| Urinary tract                      |            |                |                  | 0.83 (0.78-0.89) <0.01  |
| <b>Wells 2011</b>                  |            |                |                  |                         |
| <b>Number at risk</b>              |            | <b>132</b>     | <b>333</b>       |                         |
| <b>Age, y</b>                      |            | <b>72 ± 13</b> | <b>62 ± 16</b>   | <b>&lt;0.01</b>         |
| <b>Gender (female)</b>             |            | <b>54 (59)</b> | <b>149 (45)</b>  | <b>0.85 (0.57-1.29)</b> |
| <b>Race</b>                        |            |                |                  |                         |
| White                              |            | 106 (80)       | 231 (69)         | 1.80 (1.10-2.93)        |
| Non-white                          |            | 26 (20)        | 102 (31)         | 0.55 (0.34-0.90)        |
| <b>Comorbidities</b>               |            |                |                  |                         |
| Diabetes mellitus                  |            | 54 (14)        | 111 (33)         | 1.38 (0.91-2.10)        |
| COPD                               |            | 52 (39)        | 96 (29)          | 1.60 (1.05-2.45)        |
| Coronary artery disease            |            | 53 (40)        | 64 (19)          | 2.82 (1.81-4.39)        |

ACE: angiotensin-converting enzyme; AF: atrial fibrillation; APACHE: Acute physiology and Chronic Health Evaluation; ICU: intensive care unit; PAF: paroxysmal atrial fibrillation; SAPS: simplified acute physiology score; SOFA: sequential organ failure assessment.

Data are expressed as mean ±SD, median (interquartile range) or absolute numbers (%).

\* Age, per 10 years
